# Supplementary material for: Two novel anticancer compounds with minimum cardiotoxic property
Source: Research Square preprint supplement (doi:10.21203/rs.3.rs-54625/v2), 2020-10-19
Supplement: Supplementary file 1 [file a1b831510c6dab2ba637e7b5.docx]

**Table 1**. Percentage of H9C2 cells in each state after treatment with two concentrations of compounds **A** and **B** at 24 and 48h.**a**

**10 µM (48 h)**

**50 µM (24 h)**

**10 µM (24 h)**

**Control Compound A Compound B Control Compound A Compound B Control Compound A Compound B**

**Vital cells 97.7± 0.3 96.96 ± 0.43 97.83 ± 0.25 97.7± 0.3 92.29 ± 0.2 *** 94.11 ± 1.5* 98.88± 0.01 98.72 ± 0.19 98.98 ± 0.11**

**Early apoptosis 1.3±0.15 1.8± 0.20 1.1 ±0.25 1.3±0.15 5.3± 0.52 **** 3.0 ±0.75* 0.29±0.04 0.29± 0.04 0.08±0.02 Late apoptosis 0.3±0.07 0.36 ± 0.01 0.32±0.04 0.3±0.07 0.32 ± 0.07 0.32±0.04 0.16±0.2 0.14 ± 0.01 0.09±0.02**

**Necrosis 0.24±0.06 0.36 ± 0.23 0.32± 0.04 0.24±0.06 0.25 ± 0.03 0.32± 0.04 0.66±0.02 0.64 ± 0.06 0.85± 0.1**

aThe data presented are the mean ± SEM of three independent experiments. **p*<0.05,***p* < 0.01,****p* < 0.001,*****P*<0.0001 compared with control.
